# Supplementary material for: Rapid characterization of CRISPR-Cas9 protospacer adjacent motif sequence elements
Source: PubMed Central journal article supplement (PMC4653880; doi:10.1186/s13059-015-0818-7), 2015-11-19
Supplement: 13059_2015_818_MOESM1_ESM.pdf [file 13059_2015_818_MOESM1_ESM.pdf]

## Supporting Information

### Rapid Characterization of Cas9 Protospacer Adjacent Motif Sequence Elements

Tautvydas Karvelis, Giedrius Gasiunas, Joshua Young, Greta Bigelyte, Arunas Silanskas, Mark Cigan and Virginijus Siksnys

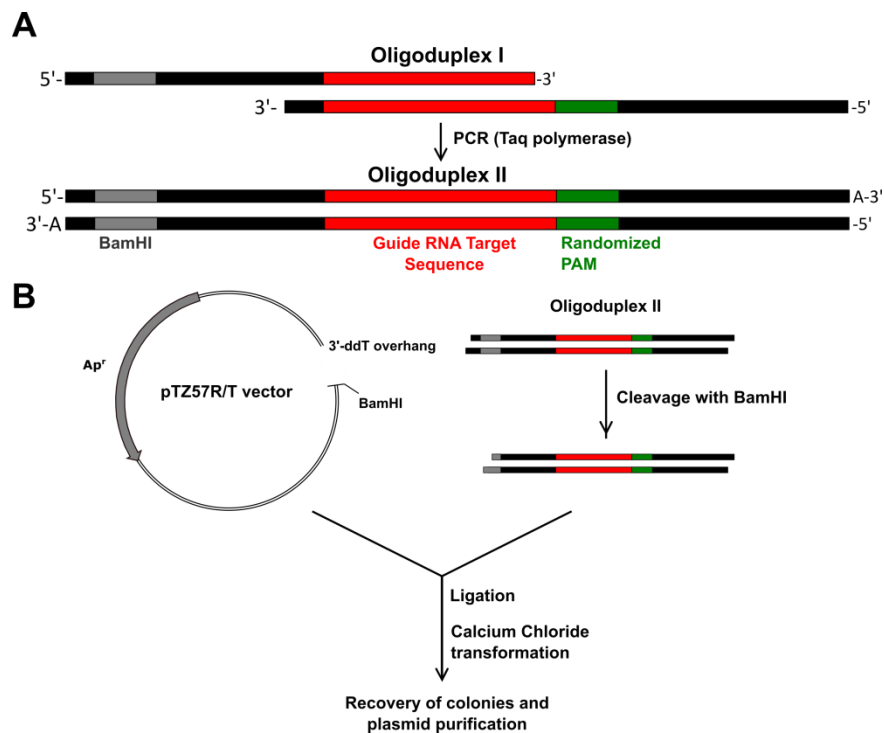

**Supplementary Figures S1A & B. Schematic for generating randomized PAM plasmid DNA libraries.** **A.** Single-stranded oligonucleotide containing the randomized PAM region is hybridized to a second oligonucleotide forming oligoduplex I and converted into a fully double-stranded DNA, oligoduplex II, by extension with Taq polymerase. The region containing the randomized PAM sequence is in green and the guide RNA target sequence region is in red. **B.** Oligoduplex II is cloned into the plasmid DNA vector over BamHI and 3' dA overhanging ends, transformed into *E. coli* and plasmid vector DNA recovered.

**A**

|            |   | PAM Position |        |        |        |        |
|------------|---|--------------|--------|--------|--------|--------|
|            |   | 1            | 2      | 3      | 4      | 5      |
| Nucleotide | G | 22.88%       | 23.06% | 26.94% | 23.81% | 25.63% |
|            | C | 28.07%       | 26.92% | 27.55% | 28.34% | 26.71% |
|            | A | 25.86%       | 26.89% | 25.29% | 24.90% | 25.77% |
|            | T | 23.18%       | 23.13% | 20.23% | 22.96% | 21.89% |
| Average    |   | 25.00%       | 25.00% | 25.00% | 25.00% | 25.00% |
| S.E.M.     |   | 1.22%        | 1.10%  | 1.66%  | 1.18%  | 1.06%  |

**B**

|            |   | PAM Position |        |        |        |        |        |        |
|------------|---|--------------|--------|--------|--------|--------|--------|--------|
|            |   | 1            | 2      | 3      | 4      | 5      | 6      | 7      |
| Nucleotide | G | 23.33%       | 20.49% | 21.49% | 20.41% | 22.41% | 22.38% | 20.83% |
|            | C | 35.35%       | 29.44% | 30.95% | 30.33% | 27.56% | 30.33% | 31.78% |
|            | A | 19.30%       | 31.08% | 28.83% | 29.95% | 26.46% | 28.67% | 26.70% |
|            | T | 22.02%       | 18.99% | 18.73% | 19.30% | 23.57% | 18.62% | 20.68% |
| Average    |   | 25.00%       | 25.00% | 25.00% | 25.00% | 25.00% | 25.00% | 25.00% |
| S.E.M.     |   | 3.55%        | 3.07%  | 2.91%  | 2.98%  | 1.20%  | 2.73%  | 2.66%  |

**Supplementary Figures S2A & B. Nucleotide composition of the 5 bp (A) and 7 bp (B) randomized PAM regions.** Position frequency matrix (PFM) [1] was used to calculate the nucleotide composition at each position of the PAM region in the 5 bp and 7 bp randomized PAM libraries to ensure a near random and balanced incorporation of each base pair.

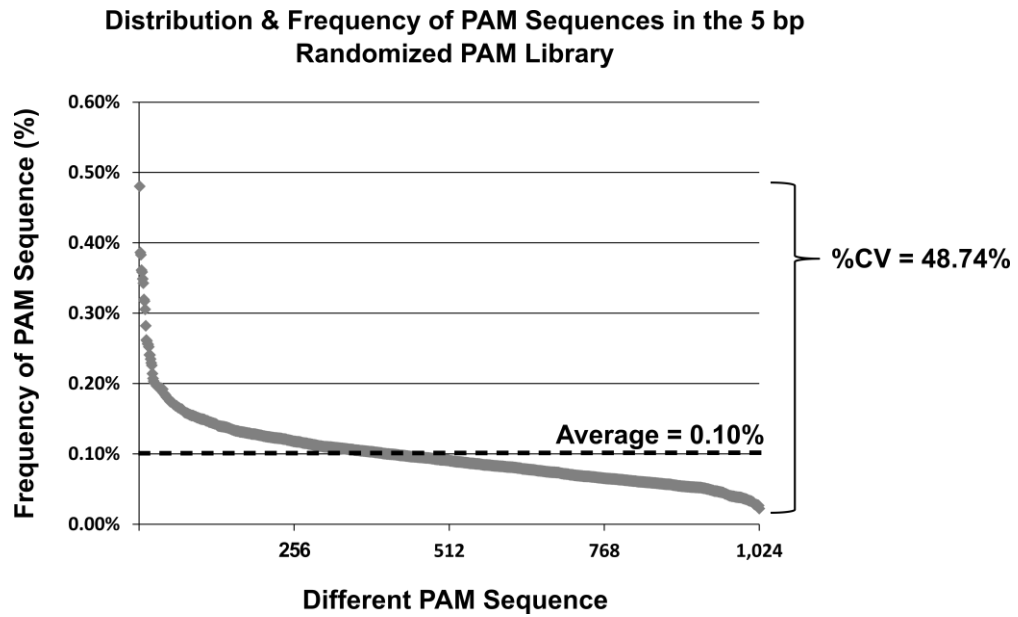

**Supplementary Figure S3. PAM sequence distribution from a 5 nucleotide (5N) randomized Protospacer Adjacent Motif (PAM) plasmid library.** The PAM sequence distribution was visualized by ordering the frequency of each PAM from greatest to least and displaying them graphically. All 1,024 possible PAM sequences were present at an average frequency of 0.10% with a coefficient of variation (CV) of 48.74%.

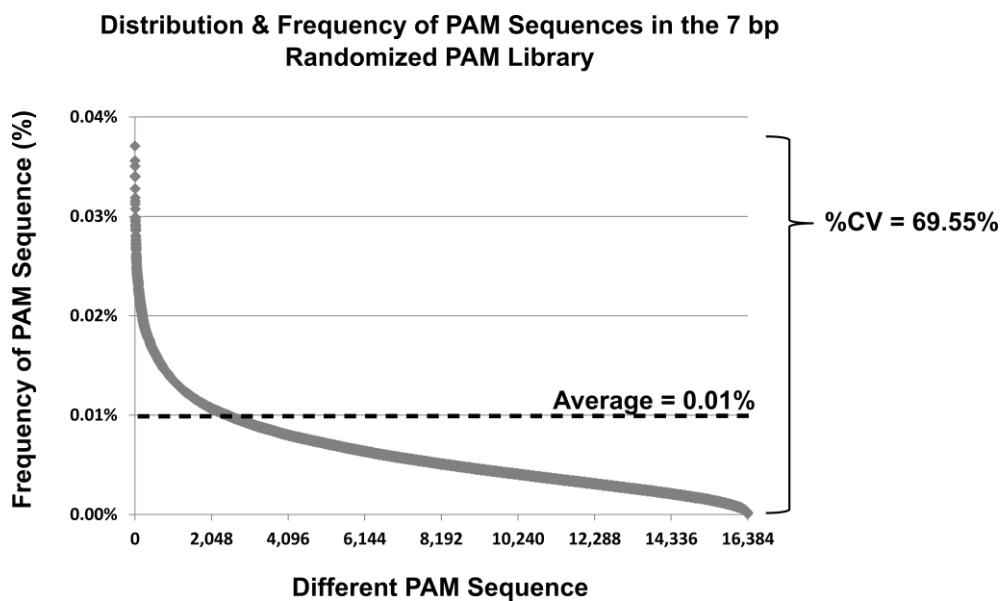

**Supplementary Figure S4. PAM sequence distribution from a 7 nucleotide (7N) randomized Protospacer Adjacent Motif (PAM) plasmid library.** The PAM sequence distribution was visualized by ordering the frequency of each PAM from greatest to least and displaying them graphically. All 16,384 possible PAM sequences were present at an average frequency of 0.01% with a coefficient of variation (CV) of 69.55%.

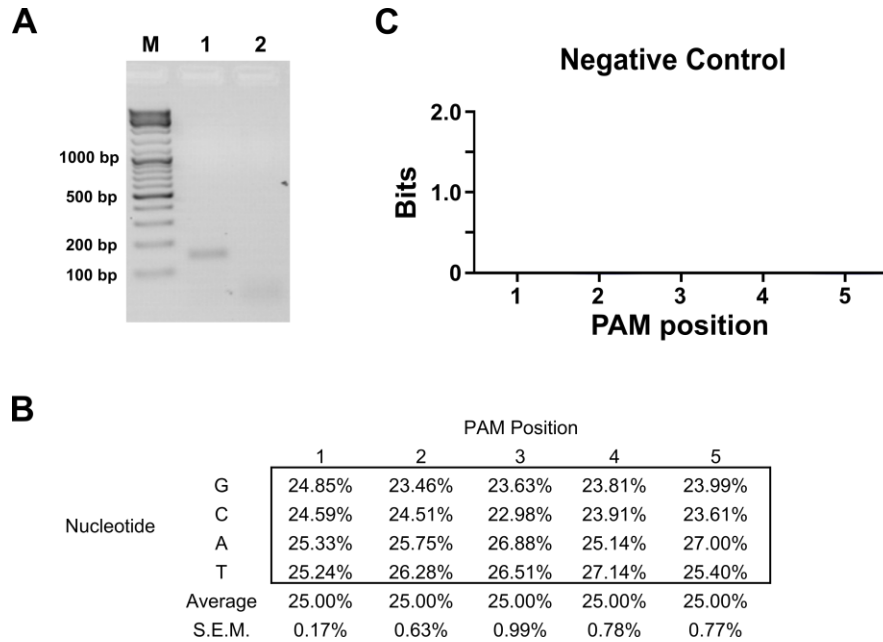

**Supplementary Figures S5A, B and C. PCR enrichment and analysis of plasmid DNA library in the absence of Cas9-guide RNA complexes.** **A.** PCR products were only obtained with primer pair TK-119/pUC-dir designed to amplify uncut species of the randomized PAM library (lane 1) while primer pair TK-117/pUC-dir designed to amplify cleaved species of the randomized PAM library to which an adapter had been ligated failed to yield PCR amplification products (lane 2). **B & C.** Analysis of nucleotide distribution in the randomized PAM region of a PCR product (generated using primer pair TK-119/pUC-dir) obtained from the 5 bp randomized PAM library in the absence of Cas9-guide RNA complex digestion. Data is presented in two forms, as a position frequency matrix (PFM) ([1]) (**B**) and as a WebLogo [2] (**C**).

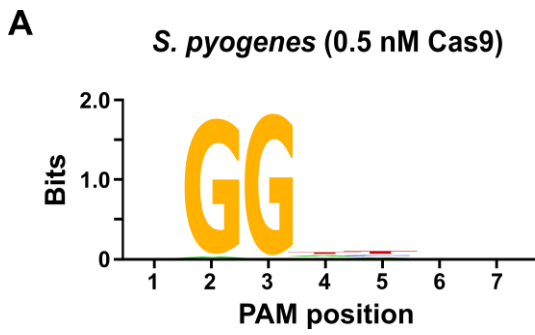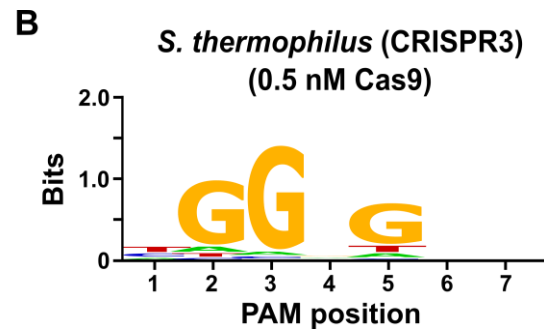

**Supplementary Figures S6A and B. PAM preferences for *S. pyogenes* (A) and *S. thermophilus* CRISPR3 (B) Cas9 proteins with the 7 bp randomized PAM library. Frequency of nucleotides at each PAM position was independently calculated using a position frequency matrix (PFM) [1] and plotted as a WebLogo [2].**

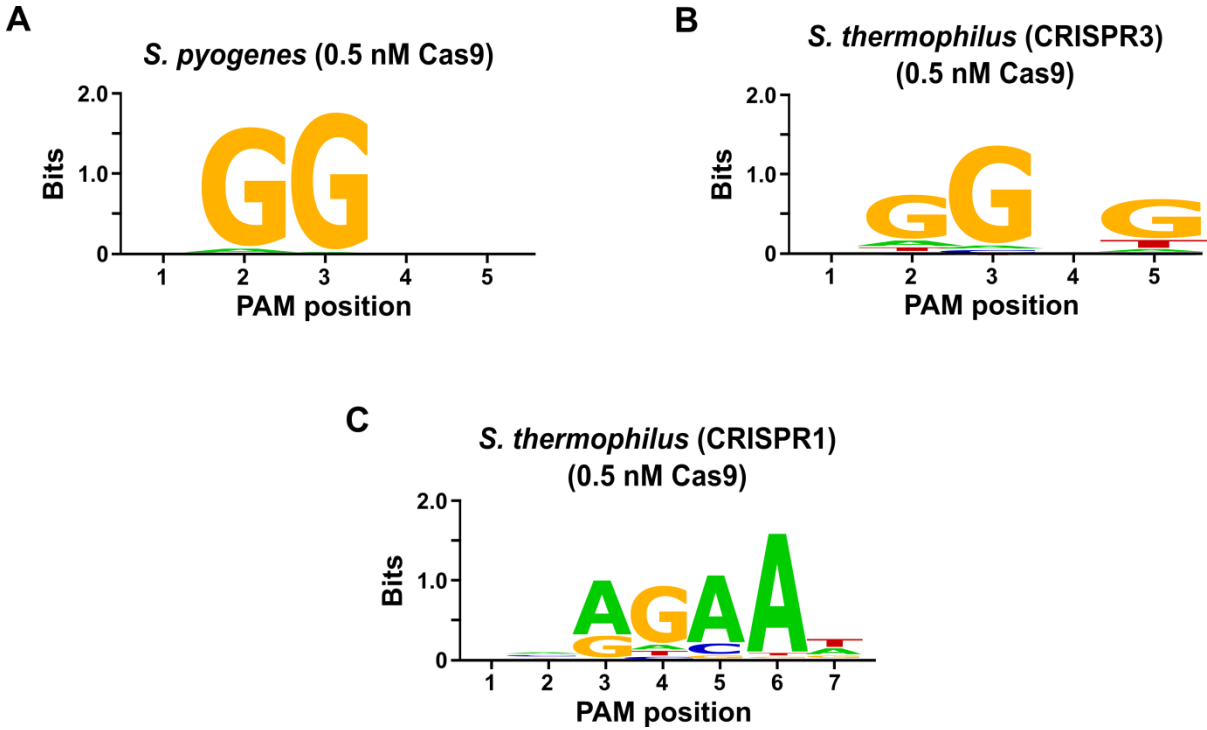

Supplementary Figures S7A, B and C. PAM preferences for *S. pyogenes* (A), *S. thermophilus* CRISPR3 (B) and *S. thermophilus* CRISPR1 (C) Cas9 proteins when complexed with a single guide RNA (sgRNA). Frequency of nucleotides at each PAM position was independently calculated using a position frequency matrix (PFM) [1] and plotted as a WebLogo [2].

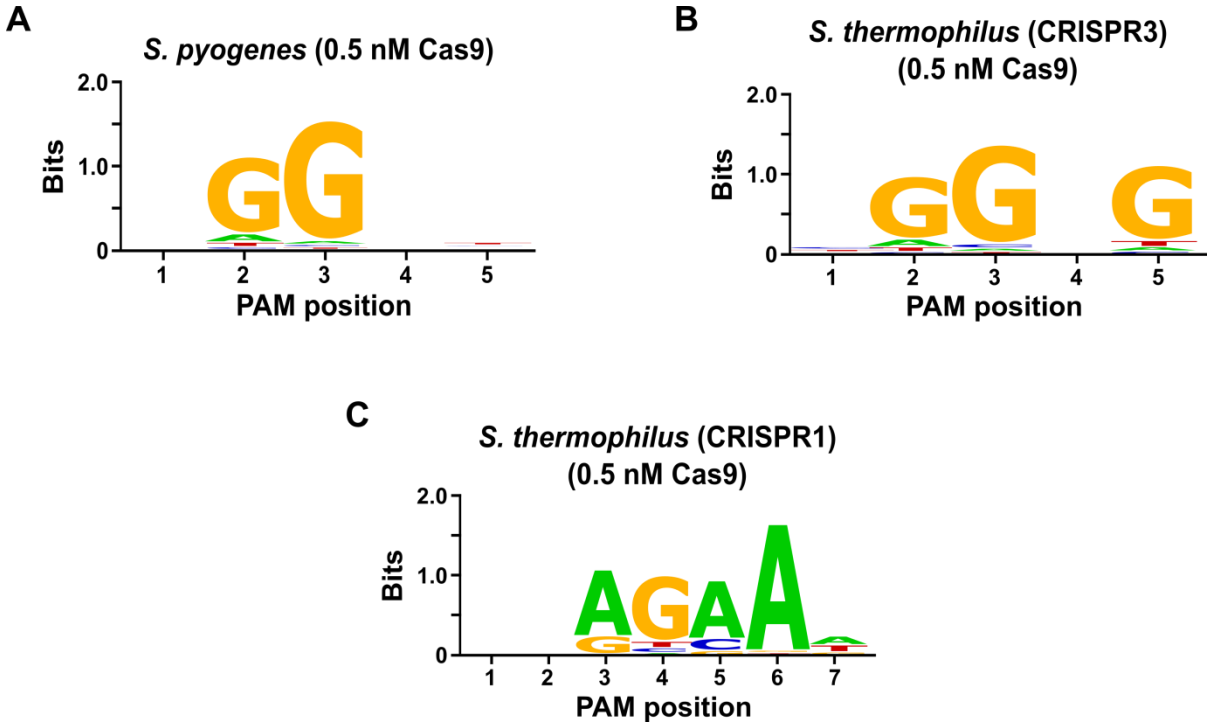

Supplementary Figures S8A, B and C. PAM preferences for *S. pyogenes* (A), *S. thermophilus* CRISPR3 (B) and *S. thermophilus* CRISPR1 (C) Cas9 proteins using a different spacer and protospacer target. Frequency of nucleotides at each PAM position was independently calculated using a position frequency matrix (PFM) [1] and plotted as a WebLogo [2].



ATCATATCATATCGAGTTTTAGTAAGGAACTATAGCACCTGCCGCTAAGACCACTAAATCTGATACATCATATCATATCGAG  
CTTTAGTAAGGAACTATAGCTTGGACCTACTATGGCATATATACATTTAGATCATATCATATCGAGTTTTAGTAAGGAACCA  
TAGCCTACAATAACAATTTCCCTCATACCACACTATCATATCATATCGAGTTTTAGTAAGGAACTATAGCCAATTAAGAA  
GGTATCACAGATTGCTTTATCATATCATATCGAGTTTTAGTAAGGAACTATAGCAACAGTCGTATCGTTGTATTTATCAATA  
GATCATATCATATCGAGCTTCAGTAAGGAACTATAGCGACATTGGTTGCGGCAATAAGACAGTACGCATCATATCATATCA  
GCTTTAGTAAGGAACTATAGCAGCAATATGCTAGCCCTCACATTTACCCGAATCATATCATATCGAGTTTTAGTAAGGAACT  
ATAGT

**Supplementary Figure S9. CRISPR array repeats of the Type II CRISPR-Cas system from *B. laterosporus* SSP360D4.** Repeats are shown in blue with mismatches shown in red. Spacer sequences are shown in black.



|            |   | PAM Position |        |        |        |        |        |        |
|------------|---|--------------|--------|--------|--------|--------|--------|--------|
|            |   | 1            | 2      | 3      | 4      | 5      | 6      | 7      |
| Nucleotide | G | 20.87%       | 18.43% | 19.33% | 12.94% | 0.27%  | 25.40% | 20.87% |
|            | C | 32.72%       | 27.42% | 25.45% | 40.59% | 96.53% | 30.72% | 0.69%  |
|            | A | 20.66%       | 24.24% | 28.25% | 10.74% | 2.86%  | 36.17% | 69.51% |
|            | T | 25.75%       | 29.90% | 26.97% | 35.74% | 0.34%  | 7.71%  | 8.93%  |

**Supplementary Figure S11. Position frequency matrix (PFM) of *B. laterosporus* SSP360D4 Cas9 cleaved PAM sequences.** Position frequency matrix (PFM) [1] of the PAM sequences supporting cleavage under the 0.5 nM Blat Cas9 “direct” sgRNA RNP complex digest conditions in the 7 bp randomized PAM library.

ATGGCCCCAAGAAGAAAAGGAAGGTCATGGCCTACACGATGGGCATCGACGTCGGCATCGCCAGCTGCGGCTGGGCCATCGTCGA  
CCTGGAGAGGCAGCGAATAATAGACATCGGCGTCCGCACCTTCGAGAAGGTAAGTTCTGCTTCTACCTTTGATATATATATAATA  
ATTATCATTAAATTAGTAGTAATATAATATTTCAAATATTTTTTTCAAATAAAAAGAAATGTAGTATATAGCAATTGCTTTTCTGTAG  
TTTATAAGTGTGTATATTTTAAATTTATAACTTTTTCTAATATATGACCAAAAACATGGTGATGTGCAGGCCGAGAACCCCAAGAACGG  
CGAGGCCCTCGCCGTCGAGGAGGAGGCCAGGAGCTCGAGGAGGAGGCTGAGGAGGAAGAAGCACCGCATCGAGAGATTAAGC  
ATATGTTTCGTCGCAACGGCCTCGCCGTCGACATCCAGCACCTCGAGCAGACCTCCGCTCCCAGAATGAAATAGACGTCTGGCAG  
CTCCGCGTCGACGGCTCGACAGGATGCTGACCCAGAAAGAGTGGCTGCGCGTATTAATTCACCTCGCCAGCGCCGCGGCTTCCA  
ATCAAATCGCAAGACCGACGGCAGCAGCGAGGACGGCCAGGTCCTCGTCAACGTACCCGAGAACGACAGATTAATGGAGGAGAAGG  
ACTACAGGACCGTCGCGGAGATGATGGTGAAGGATGAAAAATTACGCGACCACAAGCGCAATAAAAAATGGCAACTACCACGGCGTC  
GTCAGCCGACGAGCCTCCTCGTCAAATACATACATTATTCGAGACCCAGAGGCAGCACCACAACAGCCTCGCCAGCAAGGACTT  
CGAGTCGAGTACGTCAACATCTGGAGCGCCAGAGGCCCGTGGCCACGAAGGACCAGATCGAGAAGATGATCGGCACCTGCACCT  
TCCTCCCAAGAGAAAGCGCGCCCAAGGCCTCCTGGCACTTCCAGTACTTCATGCTCCTCCAGACCATCAACCACATCCGCATC  
ACCAACGTCCAGGGCACAGGAGCTCAATAAAGAGGAGATCGAGCAGGTGCTCAATATGGCCCTCACCAAAATCAAAGGTCAGCTA  
CCACGATACTAGGAAGATCCTCGACCTCAGCGAGGAGTACCAGTTCGTGCGCCTCGACTACGGCAAGGAGGATGAAAAAAAAGG  
TGGAGAGCAAGGAGACGATCATCAAGCTCGACGACTACCACAAGTCAACAAGATCTTCAACGAGGTGGAGCTGGCGAAAGGGGAG  
ACGTGGGAGGCCGACGACTACGACACCGTCGCTACGCCCTCACCTTCTTCAAGGACGACGAGGACATCCGCGACTACCTCCAGAA  
TAAATATAAAGACAGCAAAAACCGGCTGGTGAAGAACCTCGCCAATAAAGAATACAAAACGAGCTCATCGGCAAGGTCAGCACCC  
TCAGTTCAGGAAGGTCGGCCACCTCAGCCTCAAGGCCCTCAGGAAGATCATCCCTTCTCGAGCAGGGCATGACCTACGACAAG  
GCCTGCCAGGCCGCGGCTTCGACTTCAGGGCATCAGCAAGAAGAAGAGGAGCGTGGTCTCCCGTCATCGACCAGATCAGCAA  
CCCCGTCGTCAACAGGGCCCTCACCCAGACCAGGAAGGTAATTAATGCCCTAATCAAAAAATATGGCAGCCCGAGACCATCCACA  
TCGAGACGGCGAGGAGCTGTGCAAAACGTTTCGACGAGAGGAAGAATCATCCAAAAGACTACAAGGAGAACCGGGACAAGAACGAG  
CACGCAAGAAAACCTCAGCGAGCTCGGCATCATTAATCCGACGGCCCTGGACATCGTGAATACAAGCTCTGGTGGCAGCAGCA  
GGCAGGTGCATGTACAGCAATCAACCCATCAGCTTCGAGCGCCTCAAGGAGCGGCTACACCGAGGTCGACCACATCATCCCT  
ACAGCCGACGATGAACGACAGCTACAACAACCGGCTCCTCGTATGACCCGCGAGAACCAGGAGGCAATCAAAAACCCCTTC  
GAGTACATGGGCAACGACACCCAGCGTGGTACGAGTTCGAGCAGCGCTCACCACCAACCCGAAATAAAAAAGGAGAAGCCCA  
GAACCTCCTCCTCAAGGGCTTACCACCCGACGGAGCTCGAGATGCTCGAGGAGAACCTCAACGACACCCGCTATATAACTAAGT  
ACCTCAGCCACTTCATCAGCACCACTCGAGTTCAGCCCCAGCGATAAAAAGAAGAAGGTCGTCAATACATCTGGGAGGATCACC  
AGCCACCTCAGGAGCCGCTGGGGCTGGAGAAGAACCAGCGCCAGAACGACCTCCACCACGCGATGGACGCCATCGTCATCGCCGT  
CACCAGCGACTCCTTCATCCAGCAGGTCACCAACTACTACAAGAGGAAGGAGCGCCGCGAGCTCAACGGCGACGACAAGTTCCCC  
TCCCCGGAAGTTCCTCCGCGAGGAGGTCATCGCCCGCCTCAGCCGAACCCCAAGGAGCAGATCGAAGCATTGCCCAACCCTTC  
TACAGCGAGGACGAGCTCGCCGACCTCCAGCCCATCTTCGTTCAGCCGATGCCCAAGCGCAGCATCACCGGCGAGGCCACCAGGC  
CCAGTTCCGCGCGCTCGTCGGAAGACCAAGGAGGGCAAAAATATTACCGCCAAAAAACCGCCCTCGTCGACATCAGCTACGATA  
AAAATGGCGACTTCAACATGTACGGCCGAGACCGACCCCGCCACCTACGAGGCAATTAAGAGCGCTACCTCGAGTTTCGGCGGC  
AACGTCAAGAAAGCATTTAGCACCGACCTCCATAAAACCAAAAAGGACGGCACCAAGGGGCCCTCATAAAAAGCGTCAGAATAAT  
GGAAAATAAAACACTCGTCCACCCCGTCAATAAAGGCAAGGGCGTCTGTCTACAACAGCAGCATCGTCCGACCGACGTGTTCAGC  
GCAAGGAGAAGTACTACCTCCTCCCGTCTACGTACCGACGTAACCAAGGGCAAGCTCCCCAACAGGTCATCGTCGCAAGAAG  
GGCTACCACGACTGGATCGAGGTCGACGACAGCTTACCTTCTTTCAGCCTTACCCCAACGACCTCATCTTCATCAGGCAGAA  
CCCCAAGAAGAAAATATCATTAAAAAGCGCATCGAGAGCCACAGCATCAGCGACAGCAAGGAGGTCAGGAGATCCACGCCTACT  
ACAAGGGCGTCGACAGCAGCACCGCCGATCGAGTTCATCATCCACGACGGCAGCTACTACGCCAAGGGCGTCGGCGTCCAGAAC  
CTCGACTGCTTCGAAAAATATCAGGTGACATCCTCGGCAACTACTTCAAGGTCAAGGGCGAGAAGAGGCTCGAGCTCGAGACCAG  
CGACAGCAACCACAAGGGCAAGGACGTCAACAGCATTAATCAACTAGCAGGTAAGAGGCCAGGGACCGCCACGACGGCGAGCTCG  
CGCGCAGGAAGAGGGCCCGC

**Supplementary Figure S12. Maize optimized *B. laterosporus* SSP360D4 *cas9* gene.** Open reading frame of the *cas9* gene, amino and carboxyl-terminal nuclear localization signals (blue highlighted text) and Intron 2 of the potato *ST-LSI* gene (yellow highlighted text) are shown.

TGAGAGTACAATGATGAACCTAGATTAATCAATGCCAAAGTCTGAAAAATGCACCCTCAGTCTATGATCCAGAAAATCAAGATTGC  
TTGAGGCCCTGTTTCGGTTGTTCCGGATTAGAGCCCCGGATTAATTCCTAGCCGGATTACTTCTCTAATTTATATAGATTTTGATGA  
GCTGGAATGAATCCTGGCTTATTCCGGTACAACCGAACAGGCCCTGAAGGATACCAGTAATCGCTGAGCTAAATTGGCATGCTGTC  
AGAGTGTCAAGTATTGCAGCAAGGTAGTGAGATAACCGGCATCATGGTGCCAGTTTGTATGGCACCATTAGGGTTAGAGATGGTGGCC  
ATGGGCGCATGTCCTGGCCAACCTTTGTATGATATATGGCAGGGTGAATAGGAAAAGTAAAATTGTATTGTAAAAAGGGATTTCTTCT  
GTTTGTAGCGCATGTACAAGGAATGCAAGTTTTGAGCGAGGGGGCATCAAAGATCTGGCTGTGTTTCCAGCTGTTTTTGTAGCC  
CCATCGAATCCTTGACATAATGATCCCGCTTAAATAAGCAACCTCGCTTGTATAGTTCCTTGTGCTCTAACACACGATGATGATAA  
GTCGTAAAAATAGTGGTGTCAAAGAATTTCCAGGCCAGTTGTAAAAGCTAAAAATGCTATTTCGAATTTCTACTAGCAGTAAGTCGT  
GTTTAGAAAATTATTTTTTTATATACCTTTTTTCTTCTATGTACAGTAGGACACAGTGTGACGCGCCGCGTTGACGGAGAATATTTG  
CAAAAAAGTAAAAGAGAAAAGTCATAGCGGCGTATGTGCCAAAAACTTCGTCACAGAGAGGGCCATAAGAAAACATGGCCACGGCCC  
AATACGAAGCACCGGACGAAGCCCAAACAGCAGTCCGTAGGTGGAGCAAAGCGCTGGGTAATACGCAAACGTTTTGTCCCACCTT  
GACTAATCACAAGAGTGGAGCGTACCTTATAAACCGAGCCGCAAGCACCGAATTGATAATGAGGTACTGGCTGGAGCTATAGTTCC  
TTACTGAAAGGTAAGTTGCTATAGTAAGGGCAACAGACCCGAGGCGTTGGGGATCGCCTAGCCCGTGTTTACGGGCTCTCCCCATA  
TTCAAAAATAATGACAGACGAGCACCTTGGAGCATTATCTCCGAGGTGCTTTTTTTT

**Supplementary Figure S13. Maize optimized *B. laterosporus* SSP360D4 single guide RNA (sgRNA) expression cassette.** Maize U6 polymerase III promoter region is shown in black font. The region encoding the spacer targeting exon 4 of the maize fertility gene *Ms45* gene is blue highlighted black font. The repeat, self-folding tetraloop, anti-repeat and 3' tracrRNA region are indicated in yellow highlighted black font while modifications to remove putative sites of transcriptional termination are underlined. The maize U6 polymerase III terminator is represented by red font.

|             | Target<br>↓                                     | PAM |            |            |
|-------------|-------------------------------------------------|-----|------------|------------|
| Reference   | CCAGGATAATGAGGTACTGGCTGGAAGGCCCAAGAGCGGGCGAGGT  |     | Frequency  | Frequency  |
|             |                                                 |     | in Treated | in Control |
| Mutation 1  | CCAGGATAATGAGGTACTGGCTtGGAAGGCCCAAGAGCGGGCGAGGT |     | 2,807      | 0          |
| Mutation 2  | CCAGGATAATGAGGTACTGGC-GGAAGGCCCAAGAGCGGGCGAGGT  |     | 579        | 2          |
| Mutation 3  | CCAGGATAATGAGGTAC---TGAAGGCCCAAGAGCGGGCGAGGT    |     | 130        | 0          |
| Mutation 4  | CCAGGATAATGAGGTACTGG-TGAAGGCCCAAGAGCGGGCGAGGT   |     | 92         | 0          |
| Mutation 5  | CAGGATAATGAGGTACTGGcTGAAGGCCCAAGAGCGGGCGAGGT    |     | 85         | 0          |
| Mutation 6  | CCAGGATAATGAGGTACT-----GGCGAGGT                 |     | 63         | 0          |
| Mutation 7  | CCAGGATAAT-----GAGGT                            |     | 60         | 0          |
| Mutation 8  | CCAGGATAATGAGGTAC-----GGAAGGCCCAAGAGCGGGCGAGGT  |     | 48         | 0          |
| Mutation 9  | CAGGATAATGAGGTACTGGCTaGGAAGGCCCAAGAGCGGGCGAGGT  |     | 34         | 0          |
| Mutation 10 | CCAGGATAATGAGGTA-----GGAAGGCCCAAGAGCGGGCGAGGT   |     | 33         | 0          |
|             | Total Read Depth                                |     | 446,634    | 828,936    |

**Supplementary Figure S14. *S. pyogenes* Cas9 generates NHEJ mutations in maize.** Top 10 most prevalent types of NHEJ mutations detected with *S. pyogenes* Cas9 in exon 4 of the *Ms45* gene. Green font represents the spacer, while the blue font represents the overlapping PAM sequence of Spy (AGG) and Blat (AGGCCCAA). A black arrow indicates the expected site of cleavage; mutations detected with Spy Cas9 are highlighted in red; lower case font indicates an insertion; “-” indicates a deletion.

**Supplementary Table S1.** Oligonucleotides and primers used in this study.

| Oligonucleotide Name | Sequence (5' to 3')                                            |
|----------------------|----------------------------------------------------------------|
| Sth3-dir             | GGGGGGTCTCACATGAGTGACTTAGT                                     |
| Sth3-rev             | AATTACTCGAGAAAATCTAGCTTAGGCTTA                                 |
| Sth1-dir             | ACGTCTCACATGACTAAGCCATACTCAATTGGAC                             |
| Sth1-rev             | ACTCGAGACCCTCTCCTAGTTTTGGCAA                                   |
| Blat-dir             | TACCATGGCATAACAATGGGAATAGATG                                   |
| Blat-rev             | TTCTCGAGACGACTAGTTGATTTAATCGAATTGAC                            |
| Spy-dir              | AAGGTCTCCCATGGATAAGAAATACTCAATAGGCTTAG                         |
| Spy-rev              | TTCTCGAGGTCACCTCCTAGCTGACTCAAATC                               |
| GG-821N              | TGACCATGATTACGAATTCNNNNNTGTCCTCTTCCTCTTTAGCGAGC                |
| GG-820               | AAGGATCCCCGGGTACCGAGCTGCTCGCTAAAGAGGAAGAGGAC                   |
| GG-940-G             | GTGCACGCCGGCGACGTTGGGTCAACTNNGNNNNNTGTCCTCTTCCTCTTTAGCGTTTTAG  |
| GG-940-C             | GTGCACGCCGGCGACGTTGGGTCAACTNNCNNNNNTGTCCTCTTCCTCTTTAGCGTTTTAG  |
| GG-940-A             | GTGCACGCCGGCGACGTTGGGTCAACTNNANNNNNNTGTCCTCTTCCTCTTTAGCGTTTTAG |
| GG-940-T             | GTGCACGCCGGCGACGTTGGGTCAACTNNTNNNNNTGTCCTCTTCCTCTTTAGCGTTTTAG  |
| GG-939               | GACTAGACCTGCAGGGGATCCCGTCGACAAATTCTAAACGCTAAAGAGGAAGAGGAC      |
| TK-119               | GAGCTCGCTAAAGAGGAAGAGG                                         |
| pUC-dir              | GCCAGGGTTTTCCCAGTCACGA                                         |
| TK-113               | GAAATTCTAAACGCTAAAGAGGAAGAGG                                   |
| JKYS800.1            | CTACACTCTTTCCCTACACGACGCTCTTCCGATCTAAGTGAGCTCGCTAAAGAGGAAGA    |
| JKYS803              | CAAGCAGAAGACGGCATAACGAGCTCTTCCGATCTGAATTTCGAGCTCGGTACCT        |
| JKYS921.1            | CTACACTCTTTCCCTACACGACGCTCTTCCGATCTGGAATAAACGCTAAAGAGGAAGAGG   |
| JKYS812              | CAAGCAGAAGACGGCATAACGAGCTCTTCCGATCTCGGCGACGTTGGGTC             |
| JKY557               | AATGATACGGCGACCACCGAGATCTACACTCTTTCCCTACACG                    |
| JKY558               | CAAGCAGAAGACGGCATA                                             |
| TK-117               | CGGCATTCTGCTGAACCGCTCTTCCGATCT                                 |
| TK-111               | GATCGGAAGAGCGGTTTCAGCAGGAATGCCG                                |
| pUC-EheD             | CCGCATCAGGCGCCATTCGCC                                          |
| pUC-LguR             | GCGAGGAAGCGGAAGAGCGCCC                                         |
| JKYX1.1              | CTACACTCTTTCCCTACACGACGCTCTTCCGATCTAAGGGGCGCTGGCCCTCCTAGTC     |
| JKYS178Rd            | CAAGCAGAAGACGGCATAACGAGCTCTTCCGATCTGCCGGCTGGCATTGTCTCTG        |
| JKYS1083.1           | CTACACTCTTTCCCTACACGACGCTCTTCCGATCTGGAAGGCAGGTTTCGCGAACACCT    |
| JKYS1084             | CAAGCAGAAGACGGCATAACGAGCTCTTCCGATCTCTCCGAGACAACAACTGCAGGT      |
| JKYX2.1              | CTACACTCTTTCCCTACACGACGCTCTTCCGATCTAAGGGGCCGGACGCGGTGTT        |
| JKYX3                | CAAGCAGAAGACGGCATAACGAGCTCTTCCGATCTTACATGCGCAGGTGCAAAGTCTAC    |

**Supplementary Table S2.** RNAs used in this study.

| Name                    | Sequence (5'-3')                                                                                                                                                                                  | Origin                        |
|-------------------------|---------------------------------------------------------------------------------------------------------------------------------------------------------------------------------------------------|-------------------------------|
| Spy crRNA (T1)          | CGCUAAAAGAGGAAGAGGACAGUUUUAGAGCUAUGCUGUUUUUG                                                                                                                                                      | Synthetic oligonucleotide     |
| Spy tracrRNA            | GGGAAACAGCAUAGCAAGUUAAAAUAAGGCUAGUCCGUUAUCAACU<br>UGAAAAAGUGGCACCGAGUCGGUGCUUUUUUU                                                                                                                | <i>In vitro</i> transcription |
| Spy sgRNA (T1)          | GGGCGCUAAAAGAGGAAGAGGACAGUUUUAGAGCUAGAAAUAGCAAG<br>UUAAAAUAAGGCUAGUCCGUUAUCAACUUGAAAAAGUGGCACCGAG<br>UCGGUGCUUUUUUU                                                                               | <i>In vitro</i> transcription |
| Spy sgRNA (T2)          | GGGUCUAGAUAGAUUACGAAUUCGUUUUAGAGCUAGAAAUAGCAAG<br>UUAAAAUAAGGCUAGUCCGUUAUCAACUUGAAAAAGUGGCACCGAG<br>UCGGUGCUUUUUUU                                                                                | <i>In vitro</i> transcription |
| Sth3 crRNA (T1)         | CGCUAAAAGAGGAAGAGGACAGUUUUAGAGCUGUGUUGUUUUCG                                                                                                                                                      | Synthetic oligonucleotide     |
| Sth3 tracrRNA           | GGGCGAAACAACACAGCGAGUUAAAAUAAGGCUUAGUCCGUACUCA<br>ACUUGAAAAGGUGGCACCGAUUCGGUGUUUUUU                                                                                                               | <i>In vitro</i> transcription |
| Sth3 sgRNA (T1)         | GGGCGCUAAAAGAGGAAGAGGACAGUUUUAGAGCUGUGUUGUUUCGG<br>UUAAAAACAACACAGCGAGUUAAAAUAAGGCUUAGUCCGUACUCAAC<br>UUGAAAAGGUGGCACCGAUUCGGUGUUUUUU                                                             | <i>In vitro</i> transcription |
| Sth3 sgRNA (T2)         | GGGUCUAGAUAGAUUACGAAUUCGUUUUAGAGCUGUGUUGUUUCGG<br>UUAAAAACAACACAGCGAGUUAAAAUAAGGCUUAGUCCGUACUCAAC<br>UUGAAAAGGUGGCACCGAUUCGGUGUUUUUU                                                              | <i>In vitro</i> transcription |
| Sth1 crRNA (T1)         | CGCUAAAAGAGGAAGAGGACAGUUUUUGUACUCUCAAGAUUUA                                                                                                                                                       | Synthetic oligonucleotide     |
| Sth1 tracrRNA           | GGGUAAAUCUUGCAGAAGCUACAAGAUAAAGGCUUCAUGCCGAAAU<br>CAACACCUGUCAUUUUUAUGGCAGGGUGUUUUUCG                                                                                                             | <i>In vitro</i> transcription |
| Sth1 sgRNA (T1)         | GGGCGCTAAAGAGGAAGAGGACAGTTTTTGTACTCTCAAGATTCAA<br>TAATCTTGCAGAAGCTACAAAGATAAGGCTTCATGCCGAAATCAAC<br>ACCCTGTCATTTTATGGCAGGGTGTTTTCG                                                                | <i>In vitro</i> transcription |
| Sth1 sgRNA (T2)         | GGGCCGGCGACGUUGGGUCAACUGTTTTTGTACTCTCAAGATTCAA<br>TAATCTTGCAGAAGCTACAAAGATAAGGCTTCATGCCGAAATCAAC<br>ACCCTGTCATTTTATGGCAGGGTGTTTTCG                                                                | <i>In vitro</i> transcription |
| Blat sgRNA (T1) direct  | GGGCGCUAAAAGAGGAAGAGGACAGCUAUAGUCCUUAUCUGAAAAGGU<br>AAGUUGCUAUAGUAAGGGCAACAGACCCGAGGCGUUGGGGAUCGCC<br>UAGCCCGUUUUUACGGGCUCUCCCCAUUUAUCAAUUAAUUGACAGAC<br>GAGCACCUUGGAGCAUUUAUUUCCGAGGUGCUUUUUUUUU | <i>In vitro</i> transcription |
| Blat sgRNA (T1) reverse | GGGCGCUAAAAGAGGAAGAGGACAAUCAUAUCAUUCGAGGAAACUU<br>GAUAUGAUUAUGAUACUUUCAUUUUUAUAUCCAUAUAUCAUCGAGUC<br>AAUCUCAUUUAUCUGUCAUUUUUAUG                                                                   | <i>In vitro</i> transcription |
| Blat sgRNA (T1) -3      | GGGAAACGCTAAAGAGGAAGAGGGCUAUAGUCCUUAUCUGAAAAGGU<br>AAGUUGCUAUAGUAAGGGCAACAGACCCGAGGCGUUGGGGAUCGCC<br>UAGCCCGUUUUUACGGGCUCUCCCCAUUUAUCAAUUAAUUGACAGAC<br>GAGCACCUUGGAGCAUUUAUUUCCGAGGUGCUUUUUUUUU  | <i>In vitro</i> transcription |



## Supplementary References

1. Stormo GD. **Modeling the specificity of protein-DNA interactions.** *Quant Biol.* 2013; **1**:115–130.
2. Crooks GE. **WebLogo: A Sequence Logo Generator.** *Genome Res.* 2004; **14**:1188–1190.
3. Markham NR, Zuker M. **UNAFold: software for nucleic acid folding and hybridization.** *Methods Mol Biol.* 2008; **453**:3–31.
